# Supplementary material
Source: MDPI journal article supplement (https://www.mdpi.com/2673-8007/1/2/17)
Supplement: s1 [file s1]

## Supplementary Information

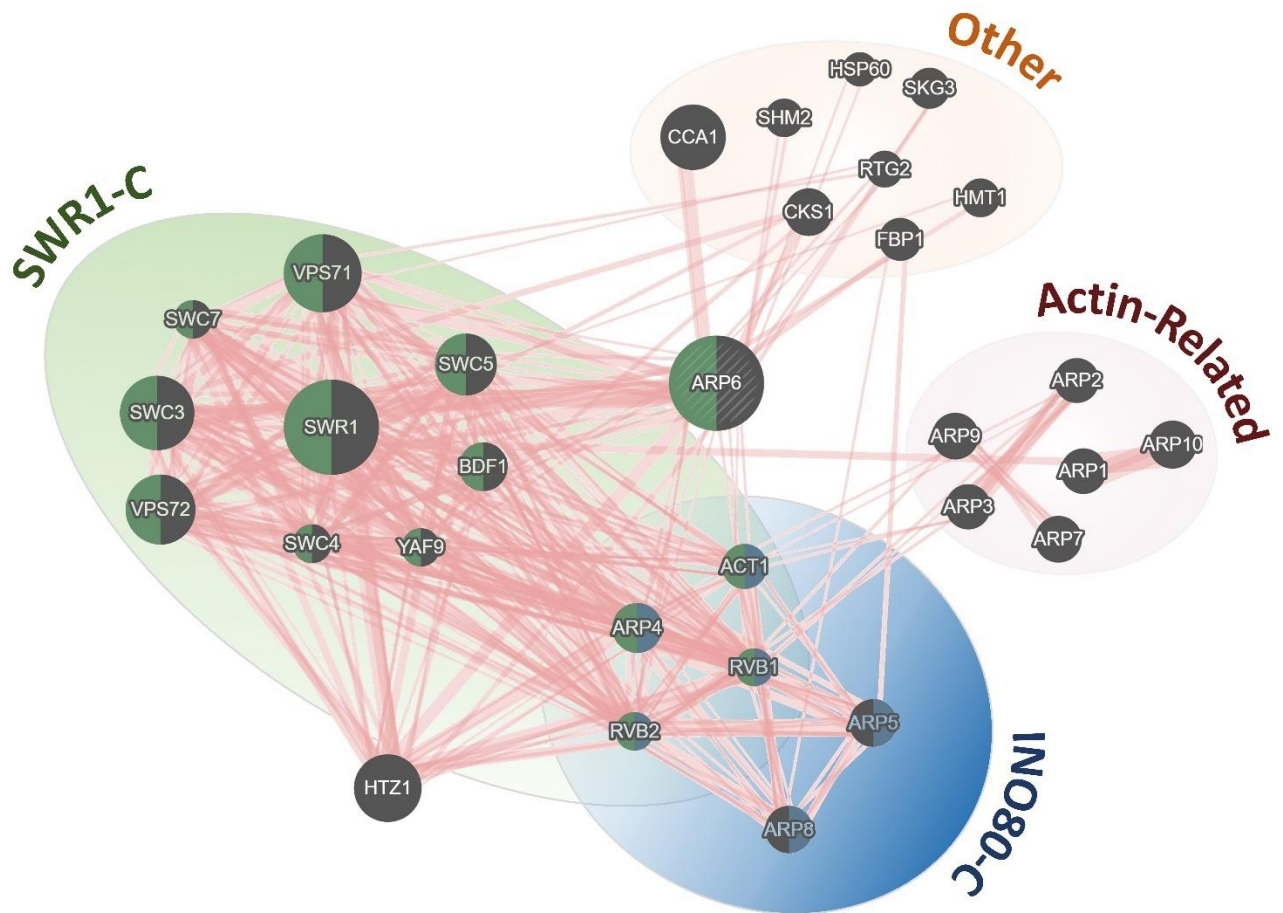

Figure S1: Protein-protein interaction network of Arp6 and associated proteins suggests functional associations with members of the SWR1-C and INO80-related chromatin remodeling complexes. Network produced using GeneMania ([www.genemania.org](http://www.genemania.org)). Nodes labelled with green are functionally-associated with the SWR1 complex and blue nodes indicate association with INO80-type complex (blue/green nodes are associated with both). Other genes are grouped into actin-related proteins (light red background) and other (light orange background).

Table S1: Functional gene ontology (GO) analysis of proteins within the Arp6 physical interaction network displayed in Figure S1. Q-values from a FDR-corrected hypergeometric test for GO term enrichment are reported.

| Function                           | FDR      | Genes in network | Genes in genome |
|------------------------------------|----------|------------------|-----------------|
| Swr1 complex                       | 6.82E-31 | 14               | 14              |
| INO80-type complex                 | 4.46E-30 | 16               | 25              |
| SWI/SNF superfamily-type complex   | 3.13E-27 | 18               | 58              |
| Chromatin remodeling               | 3.71E-24 | 18               | 83              |
| Chromatin modification             | 7.81E-21 | 20               | 191             |
| Histone exchange                   | 1.19E-19 | 11               | 18              |
| ATP-dependent chromatin remodeling | 1.19E-19 | 13               | 37              |

Table S2: Overexpression of *ARP6* compensates (rescues) sensitivity of *MMS22*, *MRE11*, *RSC2*, and *NUP84* mutants under DNA damaging conditions.

|               | Fitness under DNA damaging conditions relative to WT |                                    |
|---------------|------------------------------------------------------|------------------------------------|
| Gene name     | Single mutant                                        | Single mutant +ARP6 overexpression |
| <i>mms22Δ</i> | 43%                                                  | 81%                                |
| <i>mre11Δ</i> | 26%                                                  | 64%                                |
| <i>nup84Δ</i> | 38%                                                  | 62%                                |
| <i>rsc2Δ</i>  | 31%                                                  | 76%                                |

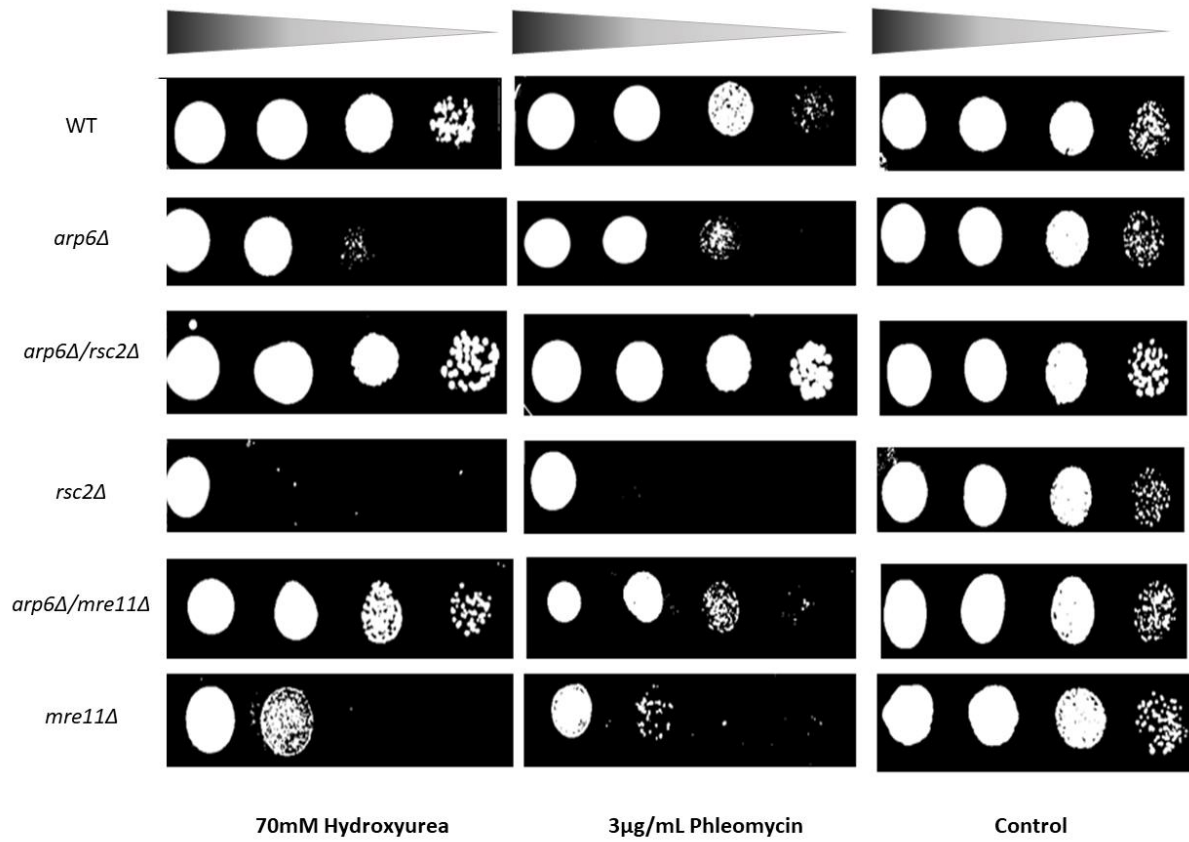

**Figure S2: Conditional chemical-genetic analysis indicates a functional relationship between *ARP6* and *MRE11/RSC2*.** Relative mutants are serially-diluted and spotted on control medium (YPD) or conditional medium (YPD+Drug) 70mM HU and 3μg/ml PHLM. Note: Some spots in this figure are the same as Figure 1A and are included as a reference.
